# Supplementary material for: Glycan remodeled erythrocytes facilitate antigenic characterization of recent A/H3N2 influenza viruses
Source: PubMed Central journal article supplement (PMC8440751; doi:10.1038/s41467-021-25713-1), 2021-09-14
Supplement: 41467_2021_25713_MOESM3_ESM.pdf [file 41467_2021_25713_MOESM3_ESM.pdf]

## Description of Additional Supplementary Files

**File Name:** Supplementary data 1

**Description:** Full glycomic data of N-glycans on unmodified fowl erythrocytes. Provided as a separate pdf file.

**File Name:** Supplementary data 2

**Description:** Full glycomic data of N-glycans on 2,6-Sia Poly-LN fowl erythrocytes. Provided as a separate pdf file.

**File Name:** Source data

**Description:** All source data. Provided as a separate xlsx file.
